# Supplementary material
Source: publisher site journal article supplement (https://www.kjim.org/upload/media/kjim-2020-195-suppl6.pdf)
Supplement: Supplementary file 1 [file kjim-2020-195-suppl6.pdf]

**Supplementary Table 6. Pathologic diagnosis in 2,927 patients with clinical HT-N**

|                      | Biopsy-proven HT-N | Non-HT-N <sup>a</sup> | Sum          |
|----------------------|--------------------|-----------------------|--------------|
| IGAN                 | 17 (9.4)           | 1,566 (54.4)          | 1,583 (51.7) |
| MN                   | 3 (1.7)            | 143 (5.0)             | 146 (4.8)    |
| FSGS                 | 4 (2.2)            | 288 (10.0)            | 292 (9.5)    |
| MCD                  | 0                  | 143 (5.0)             | 143 (4.7)    |
| DN                   | 0                  | 0                     | 0            |
| LN                   | 0                  | 0                     | 0            |
| MPGN                 | 1 (5.5)            | 59 (2.0)              | 60 (2.0)     |
| HT-N                 | 142 (78.5)         | 0                     | 142 (4.6)    |
| NONSPFGN             | 2 (1.1)            | 125 (4.3)             | 127 (4.1)    |
| SCLEROSIS            | 0                  | 65 (2.3)              | 65 (2.1)     |
| CRESGN               | 0                  | 25 (0.9)              | 25 (0.8)     |
| ATN                  | 5 (2.8)            | 57 (2.0)              | 62 (2.0)     |
| ATIN                 | 1 (5.5)            | 54 (1.9)              | 55 (1.8)     |
| CTIN                 | 0 (0)              | 61 (2.1)              | 61 (2.0)     |
| NORMAL               | 2 (1.1)            | 52 (2.1)              | 54 (2.0)     |
| THIN                 | 0                  | 63 (2.2)              | 63 (2.1)     |
| INADEQUATE           | 1 (5.5)            | 24 (0.8)              | 25 (0.8)     |
| PIGN                 | 0                  | 18 (0.6)              | 18 (0.6)     |
| HSN                  | 0                  | 22 (0.8)              | 22 (0.7)     |
| AMYLODIOSIS          | 1 (5.5)            | 6 (0.2)               | 7 (0.2)      |
| TIN                  | 1 (5.5)            | 22 (0.8)              | 23 (0.8)     |
| TMA                  | 1 (5.5)            | 22 (0.8)              | 23 (0.8)     |
| VASCULITIS           | 0                  | 5 (0.2)               | 5 (0.2)      |
| HFRS                 | 0                  | 6 (0.2)               | 6 (0.2)      |
| MYELOMA              | 0                  | 3 (0.1)               | 3 (0.1)      |
| ACTIN                | 0                  | 8 (0.3)               | 8 (0.3)      |
| C3G                  | 0                  | 7 (0.2)               | 7 (0.2)      |
| C1Q                  | 0                  | 9 (0.3)               | 9 (0.3)      |
| LIGHT CAHIN          | 0                  | 4 (0.1)               | 4 (0.1)      |
| IGMN                 | 0                  | 4 (0.1)               | 4 (0.1)      |
| ALPORT               | 0                  | 4 (0.1)               | 4 (0.1)      |
| ANTIGBM              | 0                  | 0                     | 0            |
| LC-N                 | 0                  | 0                     | 0            |
| HUS                  | 0                  | 3 (0.1)               | 3 (0.1)      |
| GBM                  | 0                  | 4 (0.1)               | 4 (0.1)      |
| CPN                  | 0                  | 2 (0.1)               | 2 (0.1)      |
| CORTICALNECROSIS     | 0                  | 2 (0.1)               | 2 (0.1)      |
| ISCHEMIC NEPHROPATHY | 0                  | 0                     | 0            |
| ANALGESIC            | 0                  | 2 (0.1)               | 2 (0.1)      |
| APN                  | 0                  | 1 (0.03)              | 1 (0.03)     |
| FABRY                | 0                  | 0                     | 0            |
| FIBRILLARY           | 0                  | 0                     | 0            |

Supplementary Table 6. Continued

|                                    | Biopsy-proven HT-N | Non-HT-N <sup>a</sup> | Sum      |
|------------------------------------|--------------------|-----------------------|----------|
| CRYO                               | 0                  | 0                     | 0        |
| CRYSTAL                            | 0                  | 0                     | 0        |
| GRANULOMA                          | 0                  | 0                     | 0        |
| ECD                                | 0                  | 0                     | 0        |
| NECGN                              | 0                  | 0                     | 0        |
| TTP                                | 0                  | 1 (0.03)              | 1 (0.03) |
| WM                                 | 0                  | 1 (0.03)              | 1 (0.03) |
| Sum of diagnosis                   | 181                | 2,881                 | 3,062    |
| No. of patients                    | 142                | 2,785                 | 2,927    |
| No. of patients with two diagnosis | 39                 | 96                    | 135      |

Values are presented as number (%).

HT-N, hypertensive nephrosclerosis; IGAN, IgA nephropathy; MN, membranous nephropathy; FSGS, focal segmental glomerulosclerosis; MCD, minimal change disease; DN, diabetic nephropathy; LN, lupus nephritis; MPGN, membranoproliferative glomerulonephritis; NONSPFGN, non-specific glomerulonephritis; CRESGN, crescentic glomerulonephritis; ATN, acute tubular necrosis; ATIN, acute tubulointerstitial nephritis; CTIN, chronic tubulointerstitial nephritis; THIN, thin membrane disease; PIGN, post-infectious glomerulonephritis; HSN, Henoch-Schonlein nephritis; TIN, tubulointerstitial nephritis; TMA, thrombotic microangiopathy; HFRS, hemorrhagic fever with renal syndrome; ACTIN, acute and chronic tubulointerstitial nephritis; C3G, C3 glomerulopathy; IGMN, IgM nephropathy; GBM, glomerular basement membrane; LC-N, ; HUS, hemolytic uremic syndrome; GBM, non-specified glomerular basement membrane abnormality; CPN, chronic pyelonephritis; APN, acute pyelonephritis; CRYO, cryoglobulinemic glomerulonephritis; ECD, Erdheim-Chester disease; NECGN, necrotizing glomerulonephritis; TTP, thrombotic thrombocytopenic purpura; WM, Waldenström's macroglobulinemia.

<sup>a</sup>Pathologic diagnoses other than HT-N.
